# Supplementary material for: Bioethanol Conversion into Propylene over Various Zeolite Catalysts: Reaction Optimization and Catalyst Deactivation
Source: MDPI journal article supplement (doi:10.3390/nano12162746), 2022-08-10
Supplement: s1 [file s1]

## Supplementary Information

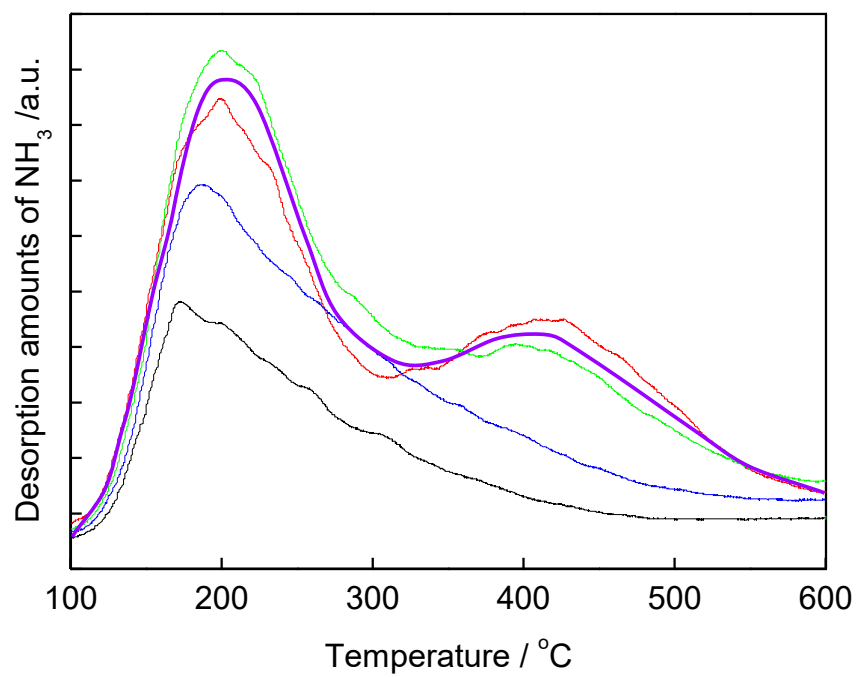

**Figure S1.**  $\text{NH}_3$ -TPD profiles of H-ZSM-5(80) catalysts calcined at different temperatures. Calcination temperature: red line 500  $^{\circ}\text{C}$ , purple line 600  $^{\circ}\text{C}$ , green line 700  $^{\circ}\text{C}$ , blue line 800  $^{\circ}\text{C}$ , black line 900  $^{\circ}\text{C}$ .

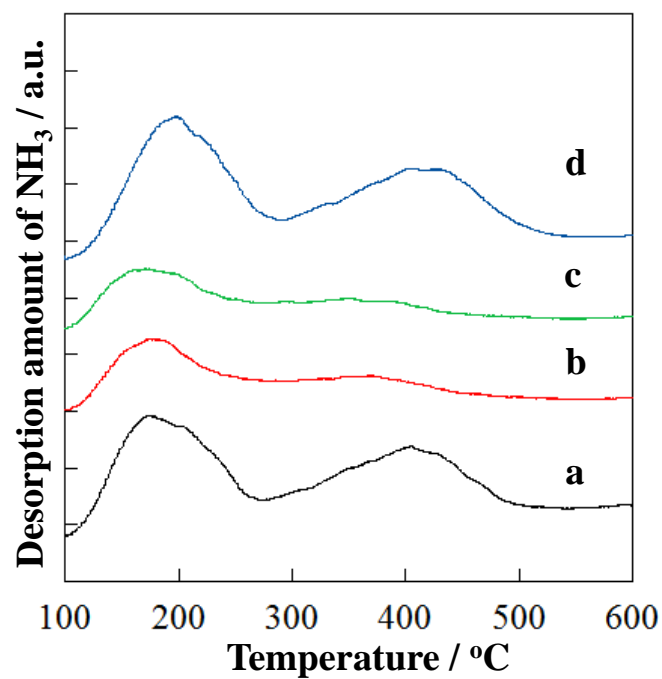

**Figure S2.**  $\text{NH}_3$ -TPD profiles of H-ZSM-5(80) catalysts of fresh and post reaction (8 h reaction) H-ZSM-8(80) catalysts. Feed composition: **a.** fresh catalyst; **b.** ethanol reaction (Ethanol:  $\text{N}_2$ =1:1); **c.** ethylene and water reaction (ethylene : water :  $\text{N}_2$ =1: 1: 1); **d.** ethylene reaction (Ethylene:  $\text{N}_2$ =1 : 2).
